# Supplementary material
Source: PubMed Central journal article supplement (PMC1069638)

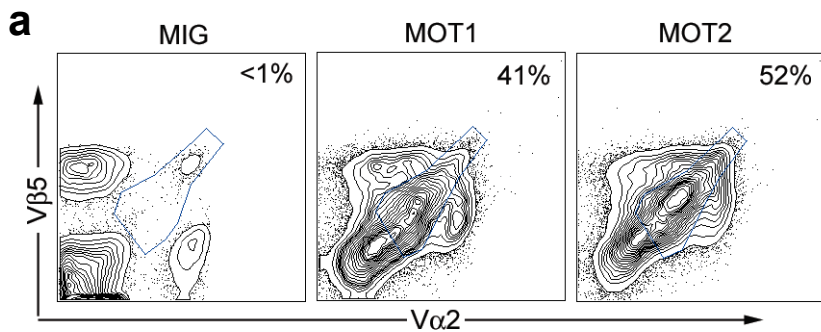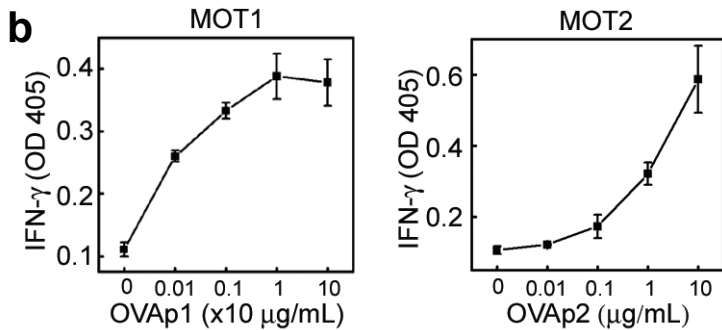

Supplement: pnas_102_12_4518__1.pdf [file pnas_102_12_4518__1.pdf]

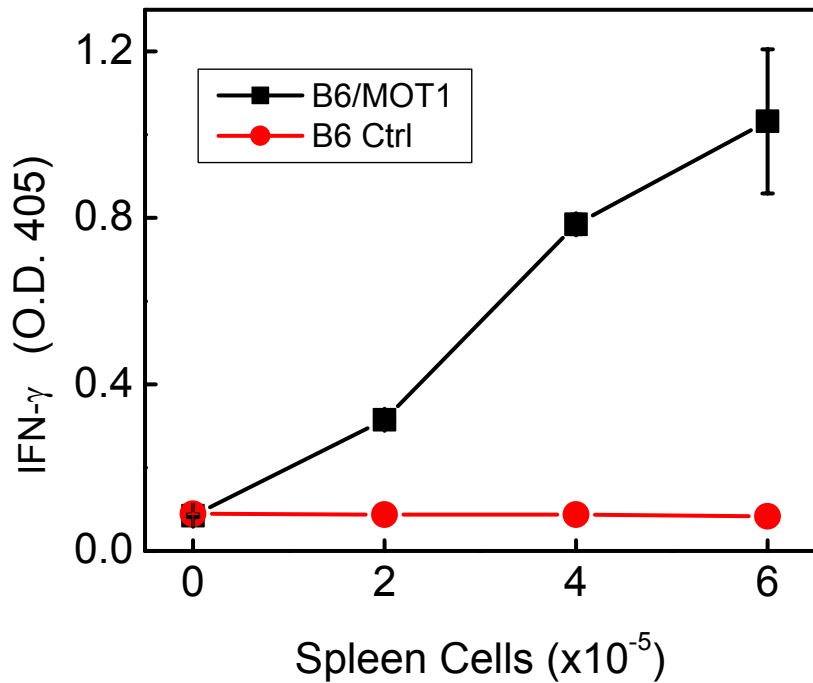

Supplement: pnas_102_12_4518__2.pdf [file pnas_102_12_4518__2.pdf]

**a**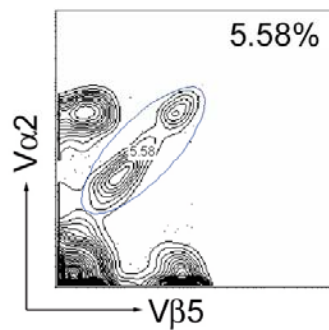**b**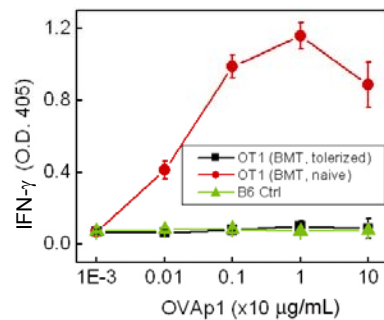**c**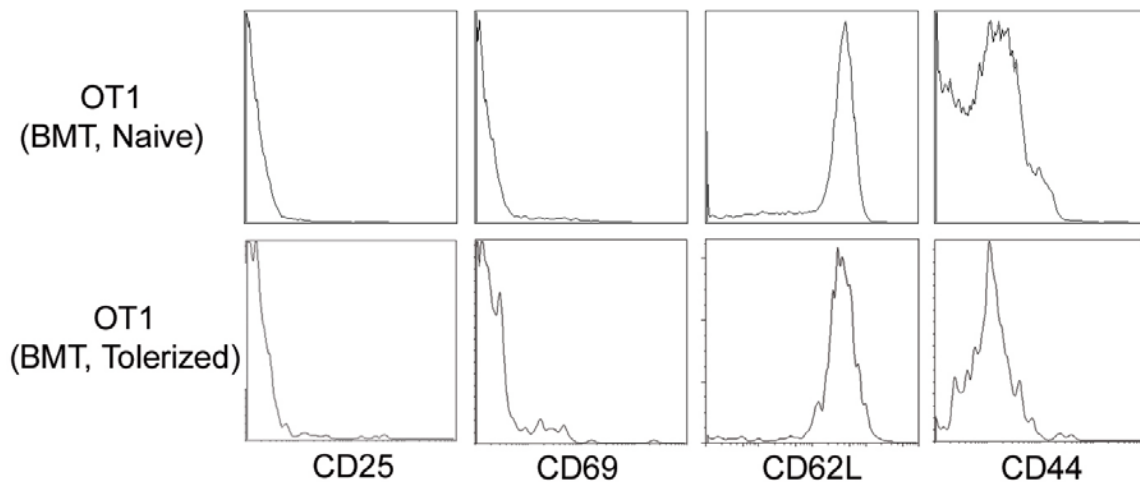

Supplement: pnas_102_12_4518__3.pdf [file pnas_102_12_4518__3.pdf]

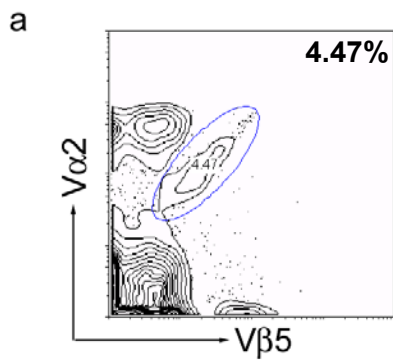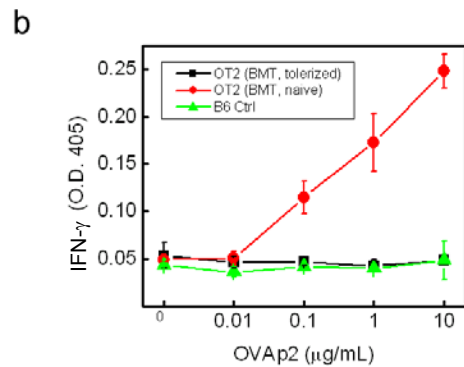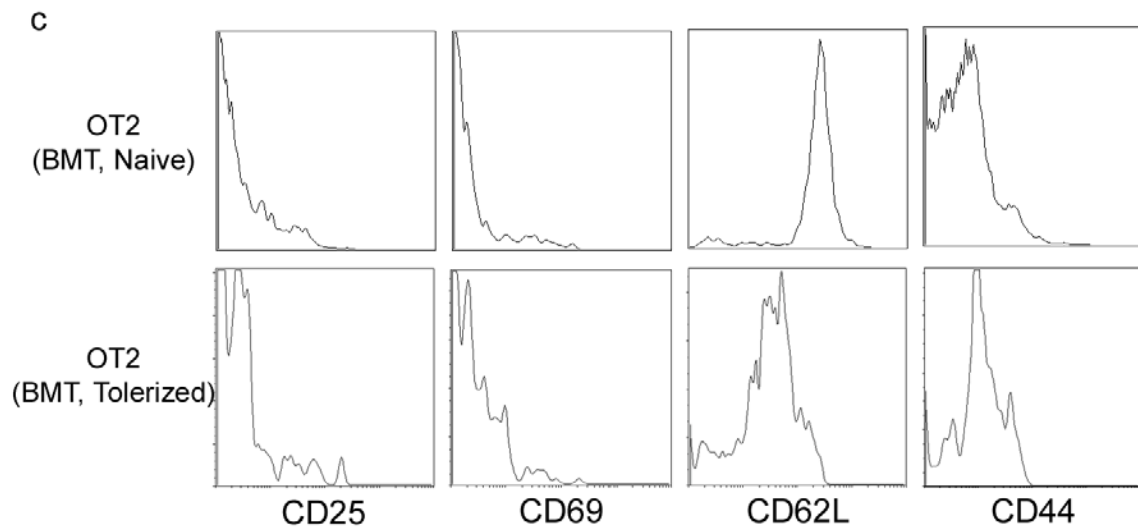

Supplement: pnas_102_12_4518__4.pdf [file pnas_102_12_4518__4.pdf]

**a**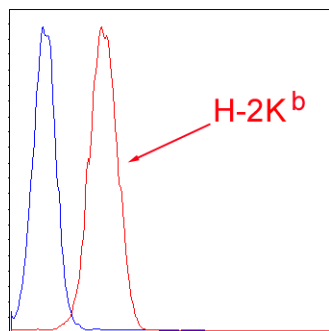**MHC I**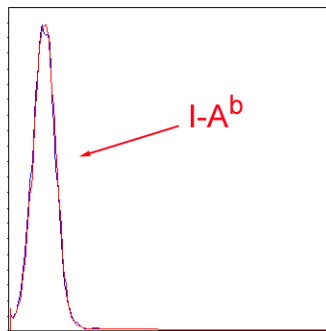**MHC II****b**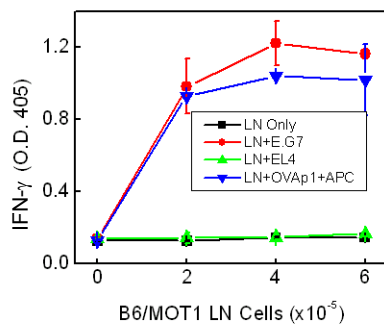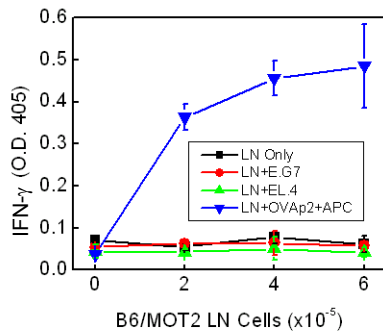

Supplement: pnas_102_12_4518__5.pdf [file pnas_102_12_4518__5.pdf]
